# Supplementary material for: Comment on “Colloidal stability of reduced graphene oxide materials prepared using different reducing agents” by Y. Qi, T. Xia, Y. Li, L. Duan and W. Chen, Environ. Sci.: Nano, 2016, 3, 1062
Source: Royal Society of Chemistry journal article supplement (doi:10.1039/c6en00424e), 2017-01-01
Supplement: c6en00424e1.pdf [file c6en00424e1.pdf]

## Supporting Information

### Comment on "Colloidal stability of reduced graphene oxide materials prepared using different reducing agents" by Y. Qi, T. Xia, Y. Li, L. Duan and W. Chen, *Environ. Sci.: Nano*, 2016, 3, 1062

Mohsen Moazzami Gudarzi,<sup>a</sup>

**Table S1.** Surface potential of GO and RGOs as a function of ionic strength. Electrophoretic mobility data in Fig. 1 in Qi et al. converted to electrokinetic potential using Smoluchowski equation.

| Ionic strength<br>(mM) | Surface Potential (mV)             |                        |        |       |
|------------------------|------------------------------------|------------------------|--------|-------|
|                        | N <sub>2</sub> H <sub>4</sub> -RGO | NaBH <sub>4</sub> -RGO | VC-RGO | GO    |
| 10                     | -22.2                              | -27.0                  | -36.8  | -33.8 |
| 50                     | -16.6                              | -24.2                  | -26.0  | -26.4 |
| 100                    | -14.6                              | -19.8                  | -21.5  | -21.7 |
| 150                    | -13.8                              | -18.4                  | -19.5  | -20.8 |
| 200                    | -12.4                              | -15.4                  | -16.5  | -18.4 |
| 250                    | -9.4                               | -12.6                  | -14.8  | -15.3 |

<sup>a</sup> Department of Inorganic and Analytical Chemistry, University of Geneva, Science II, 30, Qui Ernest-Ansermet, Geneva 1205, Switzerland  
e-mail: mohsen.moazzami@unige.ch
